# Supplementary material for: Enhancing Patient Activation and Self-Management Activities in Patients With Type 2 Diabetes Using the US Department of Defense Mobile Health Care Environment: Feasibility Study
Source: PubMed Central journal article supplement (PMC7284404; doi:10.2196/17968), 2020-05-26
Supplement: jmir_v22i5e17968_app3.pdf [file jmir_v22i5e17968_app3.pdf]

**Enhancing mHealth Technology in the PCMH Environment to Activate Chronic Care Patients  
VISIT Phase 1 Data Collecting Sheet**

**DEMOGRAPHY**

Subject# : \_\_\_\_\_ Visit Date: \_\_\_\_\_ Visit Time: \_\_\_\_\_

First Name: \_\_\_\_\_

**Introductory Question**

In general, how comfortable do you feel with using mobile apps or technology?

Very comfortable       Comfortable       Neutral       Uncomfortable       Very Uncomfortable

**Usability tasks**

| Task                                           | Task completion coding | Notes (error coding) |
|------------------------------------------------|------------------------|----------------------|
| <i>Locate mCare icon</i>                       |                        |                      |
| <i>Log in</i>                                  |                        |                      |
| <i>Accept Disclaimer</i>                       |                        |                      |
| <i>Understand Disclaimer</i>                   |                        |                      |
| <i>Locate Announcements or Health Tip Icon</i> |                        |                      |
| <i>Navigate to Health Tips</i>                 |                        |                      |
| <i>Navigate to Settings</i>                    |                        |                      |

**Setting Goals**

|                                                                     | Single Ease (1-7) | Task Completion Coding | Error Coding | Efficiency (Time) |
|---------------------------------------------------------------------|-------------------|------------------------|--------------|-------------------|
| Set a <b>BP goal</b> (low and high for both systolic and diastolic) |                   |                        |              |                   |
| Set a <b>glucose</b> goal (low and high)                            |                   |                        |              |                   |
| Set a <b>weight</b> goal                                            |                   |                        |              |                   |
| Set a <b>steps</b> per day goal                                     |                   |                        |              |                   |

Enhancing mHealth Technology in the PCMH Environment to Activate Chronic Care Patients  
VISIT Phase 1 Data Collecting Sheet

**Application Satisfaction Questions**

Is there anything confusing or that you don't understand regarding the tasks up to this point?

Yes  No

If yes, what is confusing and why?

Is there anything about how the application looks (for instance the format of the layout of the application) that you would change? Yes  No

If yes, what would you change and why?

From what you have seen so far, is there anything about how the application works that you would change?

Yes  No

If yes, what would you change and why?

**Blood Pressure (BP) Monitoring Component**

|                                       | Single Ease<br>(1-7) | Task<br>Completion<br>Coding | Error Coding | Efficiency<br>(Time) |
|---------------------------------------|----------------------|------------------------------|--------------|----------------------|
| Add Blood Pressure Manually of 132/85 |                      |                              |              |                      |
| Add Blood Pressure Bluetooth          |                      |                              |              |                      |

**Question 1: Which day last week was the systolic blood pressure (the top number) the highest?**

*Answered correctly?* Yes  No

**BP Application Satisfaction Questions**

Is there anything in the BP portion that is confusing or that you don't understand? Yes  No

If yes, what part is confusing and why?

Is there anything about how the BP portion looks (for instance the format of the layout of the application) that you would change? Yes  No

If yes, what would you change and why?

Is there anything about how the BP portion works that you would change? Yes  No

If yes, what would you change and why?

Enhancing mHealth Technology in the PCMH Environment to Activate Chronic Care Patients  
VISIT Phase 1 Data Collecting Sheet

| Glucose Monitoring Component                                                                                                                                                                                                                                                                                                                                                                                                                                                                                                                                                                                                                                                                                                                                                                                                                                                                                                        |                      |                              |              |                      |
|-------------------------------------------------------------------------------------------------------------------------------------------------------------------------------------------------------------------------------------------------------------------------------------------------------------------------------------------------------------------------------------------------------------------------------------------------------------------------------------------------------------------------------------------------------------------------------------------------------------------------------------------------------------------------------------------------------------------------------------------------------------------------------------------------------------------------------------------------------------------------------------------------------------------------------------|----------------------|------------------------------|--------------|----------------------|
|                                                                                                                                                                                                                                                                                                                                                                                                                                                                                                                                                                                                                                                                                                                                                                                                                                                                                                                                     | Single Ease<br>(1-7) | Task<br>Completion<br>Coding | Error Coding | Efficiency<br>(Time) |
| Add Glucose Manually of 400                                                                                                                                                                                                                                                                                                                                                                                                                                                                                                                                                                                                                                                                                                                                                                                                                                                                                                         |                      |                              |              |                      |
| <p>Question 1: Can you <u>locate the safety alert</u>? Yes <input type="checkbox"/> No <input type="checkbox"/></p> <p>Question 2: Can you <u>navigate</u> to the safety alert? Yes <input type="checkbox"/> No <input type="checkbox"/></p> <p>Question 3: What is the alert asking you to do?<br/>Interpreted correctly? Yes <input type="checkbox"/> No <input type="checkbox"/></p> <p>Question 4: What was the fasting blood sugar reading yesterday?<br/>Answered correctly? Yes <input type="checkbox"/> No <input type="checkbox"/></p> <p>Question 5: During the past week, were there any times that the blood sugar was higher than the target range?<br/>Answered correctly? Yes <input type="checkbox"/> No <input type="checkbox"/></p> <p>Question 6: What was the average bedtime glucose reading from (insert 4 days period)?<br/>Answered correctly? Yes <input type="checkbox"/> No <input type="checkbox"/></p> |                      |                              |              |                      |
| Glucose Application Satisfaction Questions                                                                                                                                                                                                                                                                                                                                                                                                                                                                                                                                                                                                                                                                                                                                                                                                                                                                                          |                      |                              |              |                      |
| <p>Is there anything in the glucose portion that is <u>confusing</u> or that you <u>don't understand</u>? Yes <input type="checkbox"/> No <input type="checkbox"/></p> <p>If yes, what is confusing and why?</p>                                                                                                                                                                                                                                                                                                                                                                                                                                                                                                                                                                                                                                                                                                                    |                      |                              |              |                      |
| <p>Is there anything about how the glucose application <u>looks</u> (for instance the format or the layout of the application) that you would change? Yes <input type="checkbox"/> No <input type="checkbox"/></p> <p>If yes, what would you change and why?</p>                                                                                                                                                                                                                                                                                                                                                                                                                                                                                                                                                                                                                                                                    |                      |                              |              |                      |
| <p>Is there anything about how the glucose portion <u>works</u> that you would change? Yes <input type="checkbox"/> No <input type="checkbox"/></p> <p>If yes, what would you change and why?</p>                                                                                                                                                                                                                                                                                                                                                                                                                                                                                                                                                                                                                                                                                                                                   |                      |                              |              |                      |

**Enhancing mHealth Technology in the PCMH Environment to Activate Chronic Care Patients  
VISIT Phase 1 Data Collecting Sheet**

**Weight/Scale Monitoring Component**

|                            | <b>Single Ease<br/>(1-7)</b> | <b>Task<br/>Completion<br/>Coding</b> | <b>Error Coding</b> | <b>Efficiency<br/>(Time)</b> |
|----------------------------|------------------------------|---------------------------------------|---------------------|------------------------------|
| Add Weight Manually of 175 |                              |                                       |                     |                              |
| Add Weight Bluetooth       |                              |                                       |                     |                              |

**Question 1: What was the lowest weight recorded for the past week?**  
*Answered correctly?* Yes  No

**Question 2: Has the weight increased, decreased or stayed the same in the past month?**  
*Answered correctly?* Yes  No

**Weight/Scale Application Satisfaction Questions**

**Is there anything in the weight/scale portion that is confusing or that you don't understand? Yes  No**   
 If yes, what is confusing and why?

**Is there anything about how the weight/scale portion looks (for instance the format of the layout of the application) that you would change? Yes  No**   
 If yes, what would you change and why?

**Is there anything about how the scale/weight portion works that you would change? Yes  No**   
 If yes, what would you change and why?

**Activity Monitoring Component**

**Question 1: Which date last week had the greatest number of activity minutes?**  
*Answered correctly?* Yes  No

**Question 2: What is the total number of steps taken last week?**  
*Answered correctly?* Yes  No

**Question 3: This device will track steps and active minutes. Which would you personally use to track your activity? Steps?  Active minutes?  Both?**

Enhancing mHealth Technology in the PCMH Environment to Activate Chronic Care Patients  
VISIT Phase 1 Data Collecting Sheet

**Activity Application Satisfaction Questions**

Is there anything in the activity portion that is confusing or that you don't understand? Yes  No   
If yes, what is confusing and why?

Is there anything about how the activity portion looks (for instance the format of the layout of the application) that you would change? Yes  No   
If yes, what would you change and why?

Is there anything about how the activity application works that you would change? Yes  No   
If yes, what would you change and why?

**Additional Questions**

If available, would you manually enter dated past readings for glucose, blood pressure or weight? Yes  No
